# Supplementary material for: Long non-coding RNA CASC19 is associated with the progression and prognosis of advanced gastric cancer
Source: publisher site journal article supplement (doi:10.18632/aging.102190), 2019-08-15
Supplement: Supplementary file [file aging-v11i15-102190-supplementary-material-SD1.pdf]

## SUPPLEMENTARY TABLES

Please browse Full Text version to see the data of Supplementary Table 1:

**Supplementary Table 1. All DEIncRNAs between GC tissues and non-tumor tissues in this study.**

**Supplementary Table 2. Eleven overlapping lncRNAs between DEIncRNAs and the lncRNAs in the brown module.**

| Gene symbol | logFC    | logCPM   | PValue   | FDR      |
|-------------|----------|----------|----------|----------|
| AC108463.3  | 2.617232 | 4.654981 | 4.05E-26 | 1.01E-23 |
| AL135924.2  | -2.44865 | 4.100404 | 4.09E-16 | 2.47E-14 |
| AC008114.1  | 2.425031 | 3.619495 | 1.22E-12 | 3.92E-11 |
| AL512413.1  | 2.249373 | 4.990477 | 4.39E-11 | 1.02E-09 |
| MYB-AS1     | 3.015976 | 3.010859 | 4.23E-10 | 8.08E-09 |
| AC012467.1  | 2.293675 | 3.875899 | 1.03E-09 | 1.77E-08 |
| AP005233.2  | 2.295633 | 6.175382 | 5.26E-09 | 7.62E-08 |
| KRT7-AS     | 2.427818 | 7.166851 | 1.40E-08 | 1.84E-07 |
| CASC19      | 2.273281 | 6.647498 | 2.95E-08 | 3.58E-07 |
| AC010998.1  | 3.545427 | 2.931989 | 3.96E-07 | 3.51E-06 |
| AC012668.3  | 2.233674 | 3.285144 | 3.76E-05 | 1.92E-04 |

**Supplementary Table 3. Eight representative pathways enriched in AGC samples with high CASC19 expression from GSEA.**

| Name                                    | Size | ES       | NES      | NOM p-val | FDR q-val |
|-----------------------------------------|------|----------|----------|-----------|-----------|
| Pathways in cancer                      | 321  | 0.435032 | 1.636691 | 0.024845  | 0.107062  |
| Meuroactive ligand receptor interaction | 270  | 0.438235 | 1.748006 | 0.008403  | 0.091728  |
| MAPK signaling pathway                  | 265  | 0.482662 | 1.903347 | 0         | 0.092143  |
| Regulation of actin cytoskeleton        | 211  | 0.410933 | 1.603861 | 0.045643  | 0.107686  |
| Focal adhesion                          | 197  | 0.504511 | 1.724    | 0.041152  | 0.09182   |
| Calcium signaling pathway               | 176  | 0.532904 | 2.04586  | 0         | 0.059877  |
| Wnt signaling pathway                   | 149  | 0.477498 | 1.757245 | 0.004     | 0.099863  |
| Insulin signaling pathway               | 137  | 0.484351 | 1.783265 | 0.00409   | 0.104717  |

**Supplementary Table 4. Sequences used for silencing and qRT-PCR in the present study.**

| Genes       | Sequence 5'-3'                                                  |
|-------------|-----------------------------------------------------------------|
| si-CASC19-1 | 5'-CAGCATTGCCATACTACATT-3'                                      |
| si-CASC19-2 | 5'-CAGCACAATGATGGAAGGCTT-3'                                     |
| si-CASC19-3 | 5'-CTGCATGCTTCTGATGTGAGT-3'                                     |
| si-NC       | 5'-TTCTCCGAACGTGTCACGT-3'                                       |
| CASC19      | F: 5'-TTGGAGTGCCTGGGTTAGA-3'<br>R: 5'-CTGTCCTTGCCAGTGTCTT-3'    |
| GAPDH       | F: 5'-TGACTTCAACAGCGACACCCA-3'<br>R: 5'-CACCTGTTGCTGTAGCCAAA-3' |
